# Supplementary material for: Dual RNA-Seq Analysis of the Pine-Fusarium circinatum Interaction in Resistant (Pinus tecunumanii) and Susceptible (Pinus patula) Hosts
Source: MDPI journal article supplement (doi:10.3390/microorganisms7090315), 2019-09-04
Supplement: s1 [file s1]

# **Dual RNA-seq comparison of the pine-*Fusarium circinatum* interaction between resistant (*Pinus tecunumanii*) and susceptible (*Pinus patula*) hosts**

**Erik A. Visser<sup>1</sup>, Jill L. Wegrzyn<sup>2</sup>, Emma T. Steenkamp<sup>1</sup>, Alexander A. Myburg<sup>1</sup>, Sanushka Naidoo<sup>1\*</sup>**

<sup>1</sup>Department of Biochemistry, Genetics and Microbiology, Forestry and Agricultural Biotechnology Institute (FABI), Genomics Research Institute (GRI), University of Pretoria, Private bag X20, Pretoria 0028, South Africa

<sup>2</sup>Department of Ecology and Evolutionary Biology, University of Connecticut, Storrs, CT 06269, USA

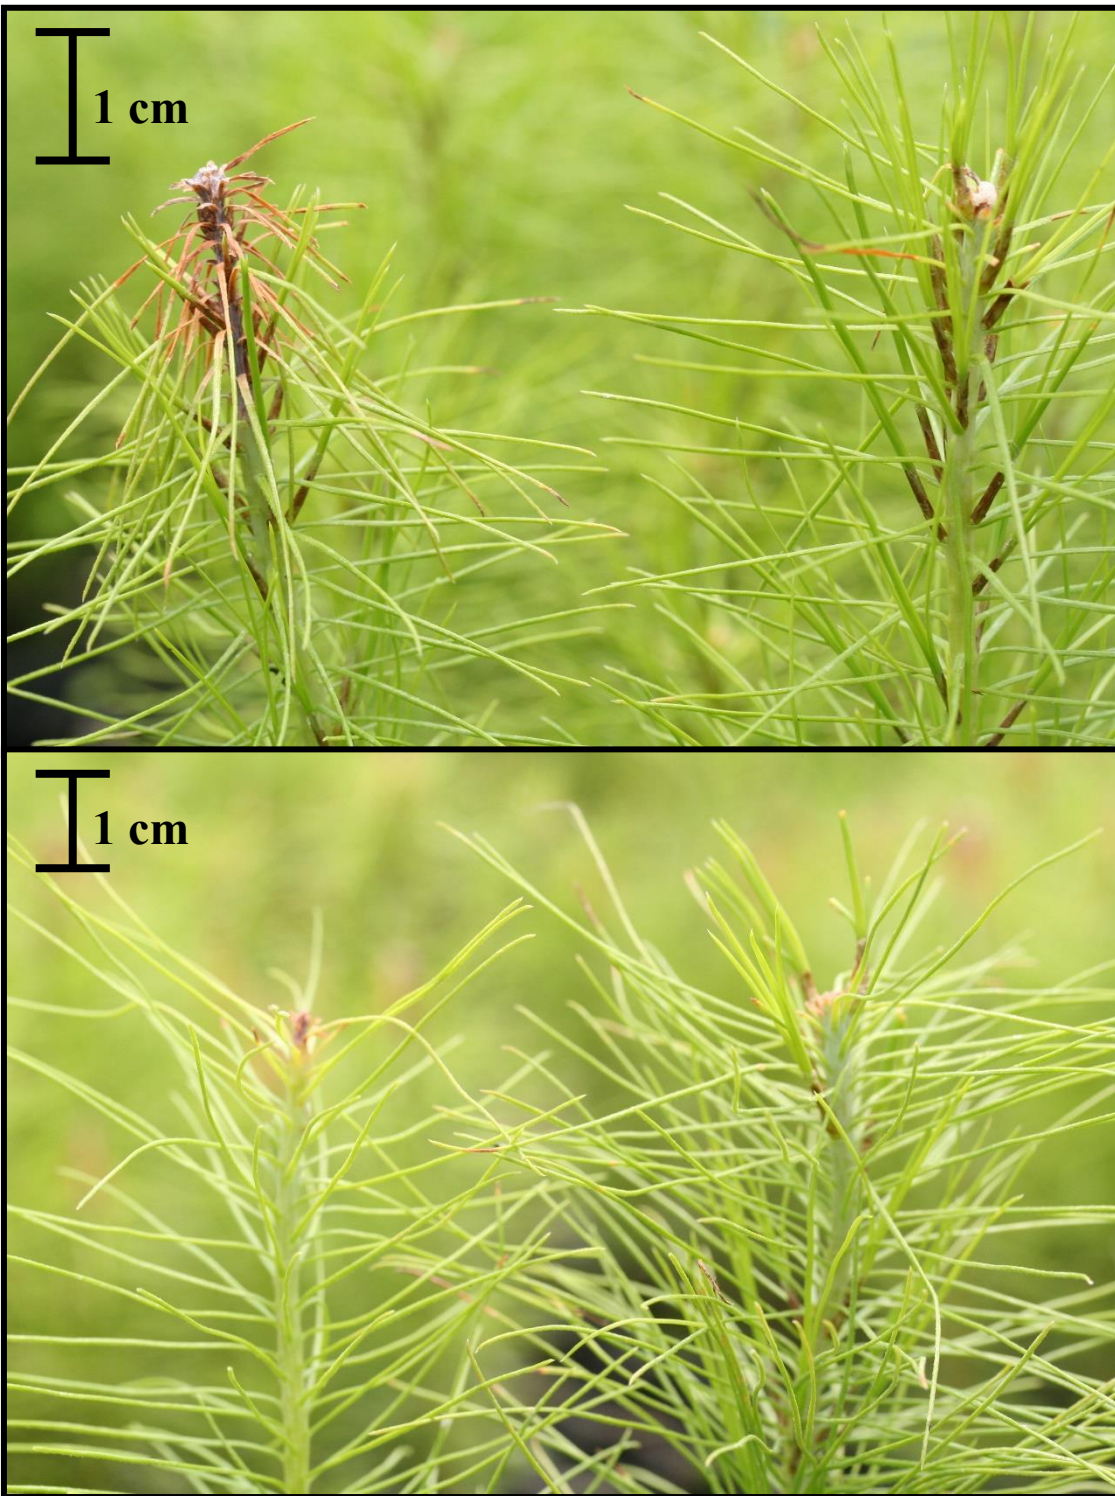

**Figure S1** *Fusarium circinatum* disease symptoms on inoculated pine seedlings at 21 days post inoculation. Left – inoculated. Right – mock-inoculated. Top – *Pinus patula*. Bottom – *Pinus tecunumanii*.



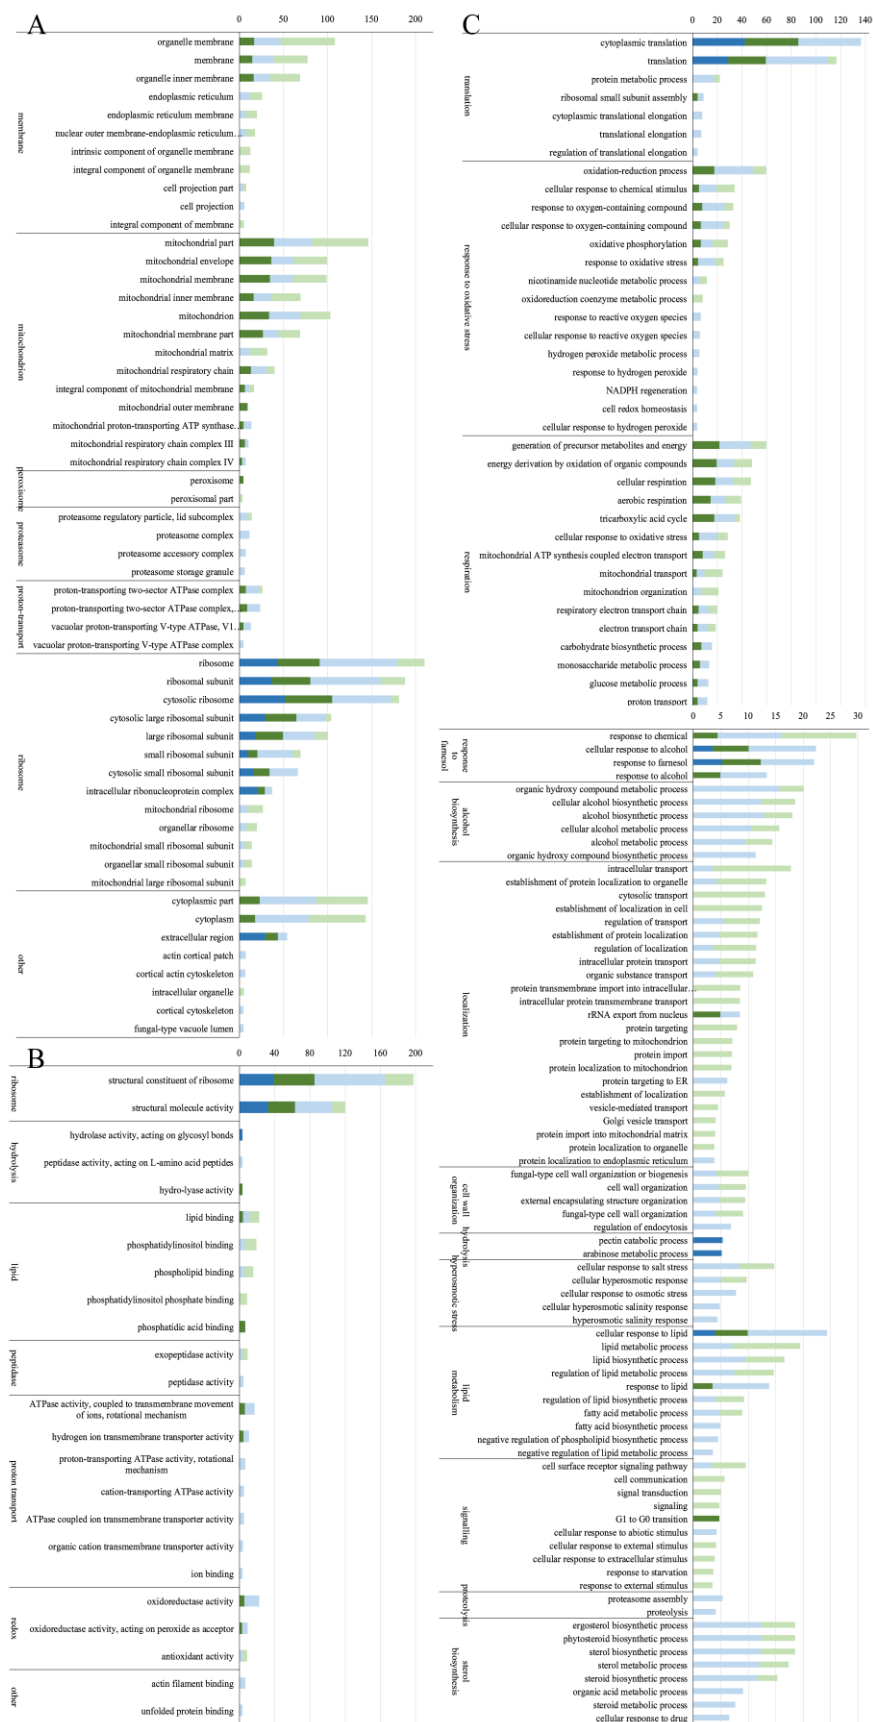

**Figure S3** Gene ontology terms enriched among high confidence *in planta* expressed *F. circinatum* genes. (A) Cellular compartment, (B) Molecular Function and (C) Biological Process GO terms enriched within up-regulated data sets at 3- (dark bars) and 7- (light bars) dpi in *P. patula* (blue) and *P. tecunumanii* (green). The y-axes represent the absolute  $\log_2(q\text{-value})$  following Benjamini & Hochberg False Discovery Rate (FDR) correction.
